# Supplementary material for: LZY3016, a novel geldanamycin derivative, inhibits tumor growth in an MDA-MB-231 xenograft model
Source: Royal Society of Chemistry journal article supplement (doi:10.1039/d3ra02131a), 2023-01-01
Supplement: d3ra02131a1.pdf [file d3ra02131a1.pdf]

## Supporting information

### **LZY3016, a novel geldanamycin derivative, inhibits tumor growth in an MDA-MB-231 xenograft model**

Zhenyu Li,<sup>a</sup> Lejiao Jia,<sup>b</sup> Hui Tang,<sup>a</sup> Yuemao Shen<sup>c</sup> and Chengwu Shen<sup>a,\*</sup>

<sup>a</sup>*Department of Pharmacy, Shandong Provincial Hospital Affiliated to Shandong First Medical University, Jinan 250021, Shandong, P. R. China*

<sup>b</sup>*Department of Pharmacy, Cheeloo College of Medicine, Shandong University Qilu Hospital, No. 107 West Wenhua Road, Jinan 250012, Shandong, P. R. China*

<sup>c</sup>*Key Laboratory of Chemical Biology (Ministry of Education), School of Pharmaceutical Sciences, Cheeloo College of Medicine, Shandong University, No. 44 West Wenhua Road, Jinan 250012, Shandong, P. R. China*

### **Contents**

|                                                                             |           |
|-----------------------------------------------------------------------------|-----------|
| <b>1. <sup>1</sup>H NMR and <sup>13</sup>C NMR Spectrum of LZY3016.....</b> | <b>S2</b> |
|-----------------------------------------------------------------------------|-----------|

---

\*Corresponding author. Tel./Fax: +86 531 68778252; E-mail: scw810@126.com.

# 1. <sup>1</sup>H NMR and <sup>13</sup>C NMR Spectrum of LZY3016

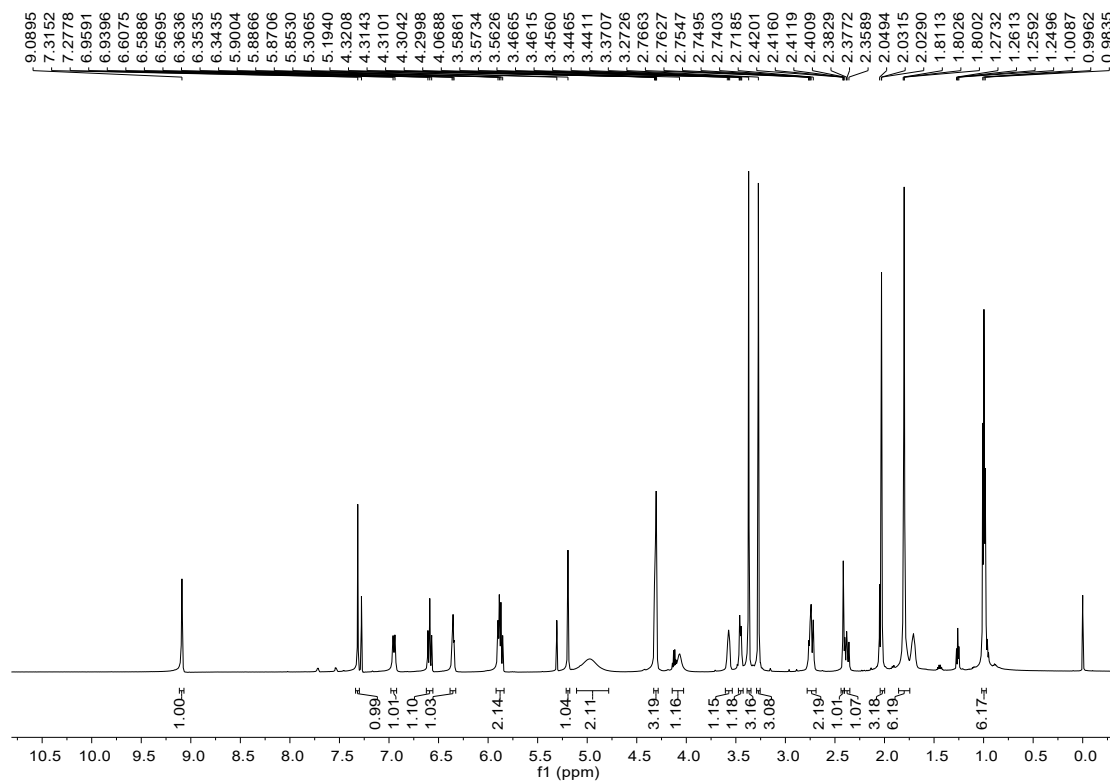

<sup>1</sup>H NMR spectrum of LZY3016 in CDCl<sub>3</sub>

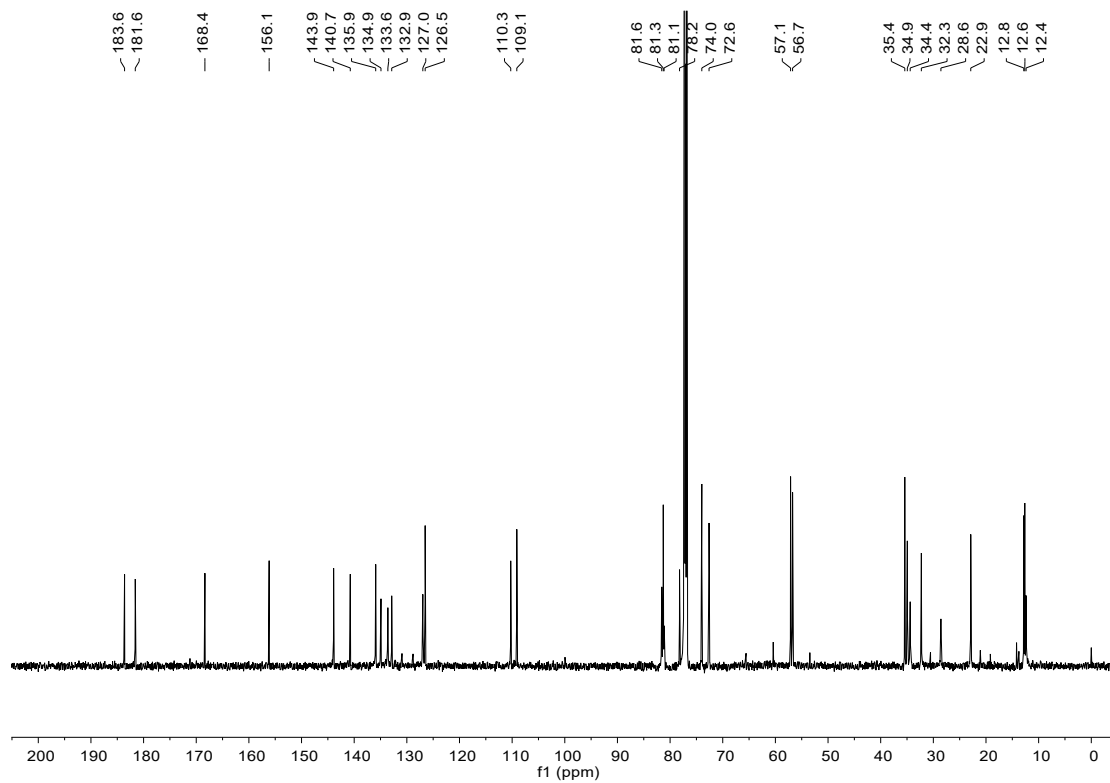

<sup>13</sup>C NMR spectrum of LZY3016 in CDCl<sub>3</sub>
